# Supplementary material for: Lactone Stabilized by Crosslinked Cyclodextrin Metal-Organic Frameworks to Improve Local Bioavailability of Topotecan in Lung Cancer
Source: MDPI journal article supplement (doi:10.3390/pharmaceutics15010142), 2022-12-31
Supplement: s1 [file s1]

## **Supporting Information**

### **Lactone stabilized by crosslinked cyclodextrin metal-organic frameworks to improve local bioavailability of topotecan in lung cancer**

Ting Xiong <sup>1,2,5</sup>, Tao Guo <sup>2</sup>, Yaping He <sup>3</sup>, Zeying Cao <sup>2,4</sup>, Huipeng Xu <sup>2,4</sup>, Wenting Wu <sup>1</sup>, Li Wu <sup>2</sup>, Weifeng Zhu <sup>1\*</sup> and Jiwen Zhang <sup>1,2,5\*</sup>

#### **Author affiliations:**

<sup>1</sup>Key Laboratory of Modern Preparation of TCM, Ministry of Education, Jiangxi University of Traditional Chinese Medicine, Nanchang, 330004, China

<sup>2</sup>Center for Drug Delivery Systems, Shanghai Institute of Materia Medica, Chinese Academy of Sciences, Shanghai, 201203, China

<sup>3</sup>Department of Pharmacy, The First Affiliated Hospital of Zhengzhou University, Zhengzhou, 450052, China

<sup>4</sup>University of the Chinese Academy of Sciences, Beijing, 100049, China

<sup>5</sup>College of Pharmacy, Shenyang Pharmaceutical University, Shenyang, Liaoning 110016, China

#### **Corresponding Author:**

Center for Drug Delivery Systems, Shanghai Institute of Materia Medica, Chinese Academy of Sciences, Shanghai, 201203, China; Tel/Fax: +86-21-20231980; E-mail: jwzhang@simm.ac.cn (Prof. Jiwen Zhang)

Key Laboratory of Modern Preparation of TCM, Ministry of Education, Jiangxi University of Traditional Chinese Medicine, Nanchang, 330004, China; Tel/Fax: +86-791-87118614; E-mail: zwf0322@126.com (Prof. Weifeng Zhu)

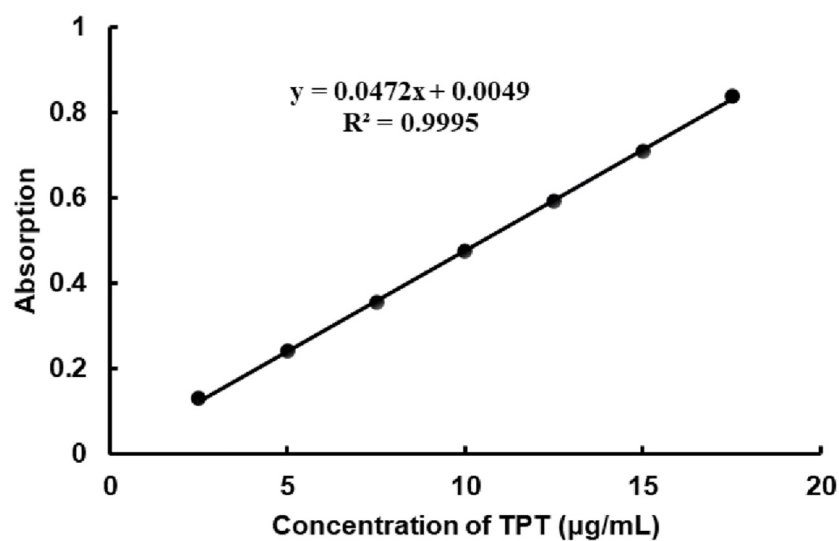

**Figure S1.** Linear calibration curve of the standard TPT solution.

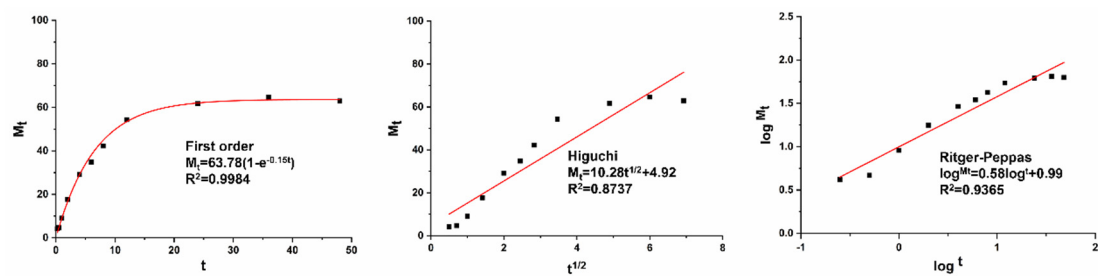

**Figure S2.** The *in vitro* release profile of TPT@CL-MOF was fitted by first-order kinetics, Higuchi models and Ritger-Peppas models.  $M_t$  is the amount of drug released at time  $t$ .

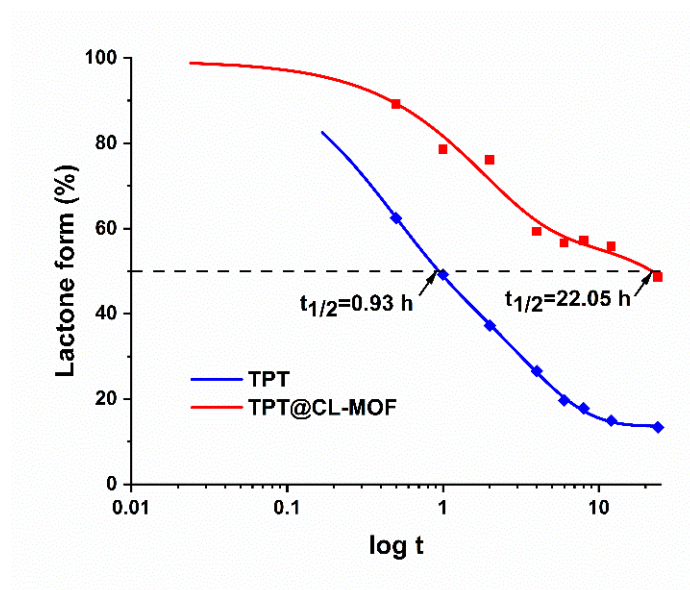

**Figure S3.** Degradation data of TPT and TPT@CL-MOF were fitted on biexponential decay equation in PBS (pH 7.4).  $t_{1/2}$  is the half-life of TPT against hydrolysis.

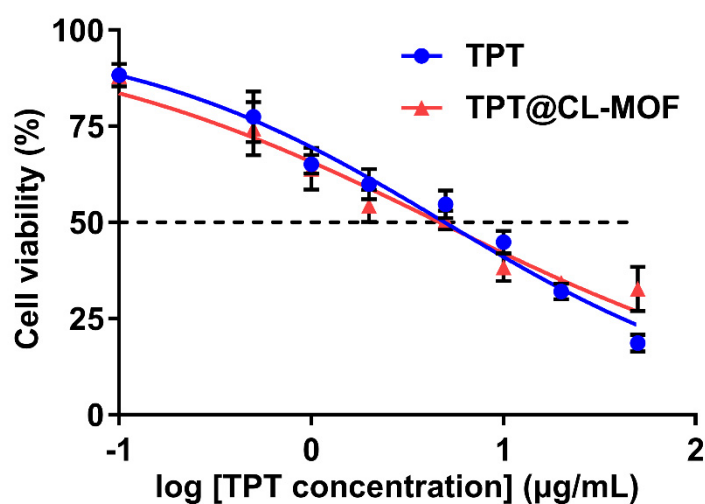

**Figure S4.** The  $IC_{50}$  of TPT and TPT@CL-MOF against B16F10 cells.

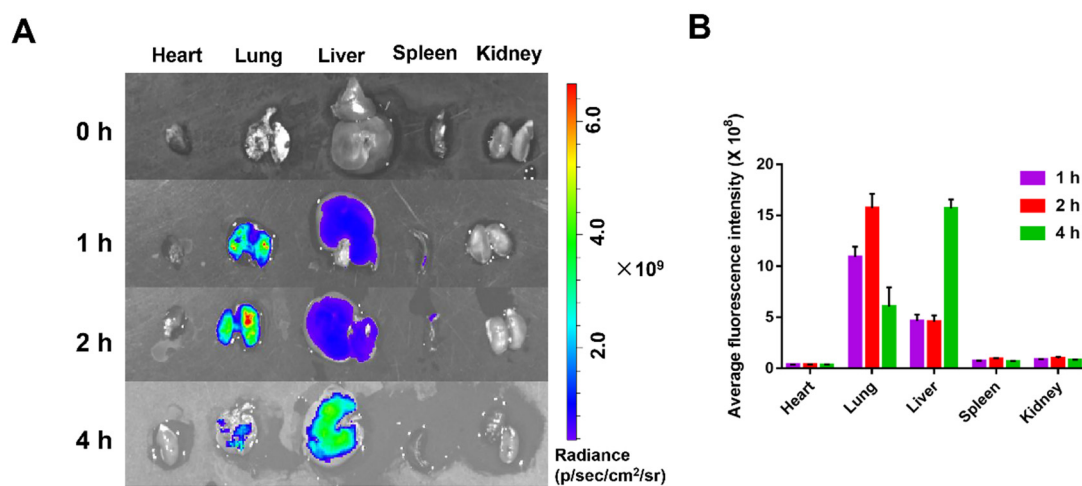

**Figure S5.** Tissue distributions of TPT@CL-MOF in C57BL/6 mice (A) and semi-quantitative analysis (B) ( $n = 3$ ).

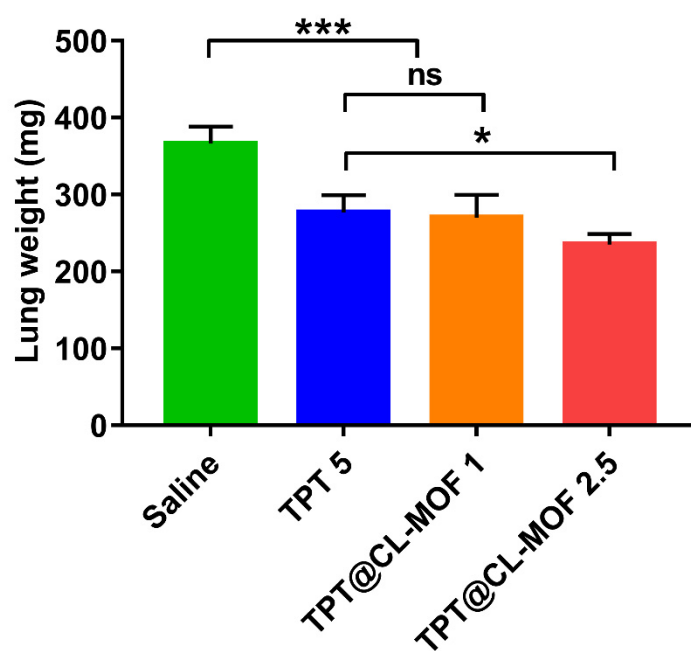

**Figure S6.** The weight of lung tissues isolated from the C57BL/6 mice bearing B16F10 cells ( $n = 5$ ). TPT@CL-MOF 1 and TPT@CL-MOF 2.5 denotes TPT at 1 mg/kg and 2.5 mg/kg, respectively.  $*p < 0.05$ ,  $***p < 0.001$ . The abbreviation “ns” denotes no significant difference between relevant treatment groups.
